# Supplementary material for: Oxygen vacancies on the surface of HxWO3−y for enhanced charge storage
Source: Royal Society of Chemistry journal article supplement (doi:10.1039/c8ta00981c), 2018-01-01
Supplement: c8ta00981c1.pdf [file c8ta00981c1.pdf]

## **Supporting Information**

### **Oxygen Vacancies on the Surface of $H_xWO_{3-y}$ for Enhanced Charge Storage**

Haiyan Wang, Ruxue Fan, Jingyu Miao, Jiayi Chen, Shanjun Mao, Jiang Deng, Yong Wang\*

Advanced Materials and Catalysis Group, Institute of Catalysis, Zhejiang University, Hangzhou 310028, PR China

## Methods

**Preparation of  $H_xWO_{3-y}/NCC$  and  $WO_3/NCC$ .** A piece of carbon cloth (CC, HCCP330, Shanghai Hesen Electric Co. Ltd., China) was cleaned with ethanol, water and dried before use. CC was then annealed at 1000 °C in industry  $N_2$  with a heating rate of 5 °C  $min^{-1}$  to obtain porous CC<sup>1</sup>, which was served as the flexible conductive carbon substrate for loading of tungsten oxide. 1 g ammonium metatungstate ( $(NH_4)_6H_2W_{12}O_{40} \cdot xH_2O$ , Aladdin) was dissolved in 20 mL deionized water adequately and porous CC was immersed in the solution for 1 h. Then, it was taken out and dried at 70 °C in an oven. Finally, porous CC loaded with ammonium metatungstate was annealed in high purity  $N_2$  (99.99% purity) at 700 °C for 1 h with a rate of 2 °C  $min^{-1}$  to synthesize  $H_xWO_{3-y}$ , denoted as  $H_xWO_{3-y}/NCC$ .  $WO_3/NCC$  was synthesized according to the same procedure to the  $H_xWO_{3-y}/NCC$ , except replacing the annealing atmosphere with industry nitrogen (99% purity). The mass density for  $H_xWO_{3-y}$  ( $WO_3$ ) is about 2 mg  $cm^{-2}$ .

**Preparation of e- $H_xWO_{3-y}/NCC$ .** Ar<sup>+</sup> plasma etching process was carried out to remove the surface OV<sub>s</sub> layer of  $H_xWO_{3-y}$ . Specifically, the synthesized  $H_xWO_{3-y}/NCC$  was etched with Ar<sup>+</sup> ions for 30 s at 3 keV and the final product was collected and denoted as e- $H_xWO_{3-y}/NCC$ .

**Preparation of NCC.** Similar to  $H_xWO_{3-y}/NCC$  and  $WO_3/NCC$ , CC was first annealed at 1000 °C in industry  $N_2$  with a heating rate of 5 °C  $min^{-1}$  to obtain porous CC. Then the obtained porous CC continue to anneal at 700 °C in high purity  $N_2$  or industry  $N_2$  with a heating rate of 5 °C  $min^{-1}$  to obtain NCC. Note that NCC obtained no matter in high purity  $N_2$  or industry  $N_2$  both show similar specific surface area (825  $m^2 g^{-1}$  vs. 896  $m^2 g^{-1}$ , Fig. S2a and Table S1) and similar electrochemical performance (CV curve, Fig. S2b). Therefore, they both were denoted as NCC without special distinction.

**Characterization.** Scanning electron microscopy (SEM) was conducted using Zeiss Sigma field emission SEM (Model 8100). High-resolution transmission electron microscopy (HRTEM) characterization was carried out with Tecnai G2 F30 S-Twin at an acceleration voltage of 300 kV. Raman spectrometer (JY, HR 800) with an 514 nm Ar laser excitation source was employed to obtain Raman spectra. X-ray photoelectron spectra (XPS) were taken with an ESCALAB MARK II spherical analyzer using an aluminum anode (Al 1486.6 eV). A Nicolet Fourier transform infrared spectroscopy was used to record FT-IR spectra. X-ray diffraction (XRD) data was collected with a D/tex-Ultima TV wide angle X-ray diffractometer equipped with Cu K $\alpha$  radiation ( $\lambda=1.54 \text{ \AA}$ ).  $N_2$  adsorption-desorption analysis was measured with micromeritics ASAP 2020 HD88 at 77 K. The specific surface area (SSA) and pore size distribution (PSD) were recorded based on Brunauer-Emmett-Teller (BET) method and density functional theory (DFT) pore model, respectively.

**Electrochemical measurements.** Electrochemical measurements were carried out in a three-electrode cell with a Gamry Reference 600 electrochemical workstation. Platinum sheet and saturated calomel electrode (SCE) electrodes were used as the counter and reference electrodes, respectively and 5 M LiCl as the electrolyte solution. Two-electrode configuration was conducted with 5 M LiCl as the electrolyte to estimate the feasibility of  $H_xWO_{3-y}/NCC$  for energy storage. Freestanding  $H_xWO_{3-y}/NCC$  was directly used as electrode materials without the need of current collectors and any other conductive additives.

### OVs generation mechanism

According to the results, it is found that  $H_xWO_{3-y}$  can only be produced in a pure  $N_2$ , while in industry  $N_2$  (99.99% purity),  $WO_3$  is produced. These indicate that a pure oxygen depleted condition is important for synthesis of OVs in  $H_xWO_{3-y}$ . Additionally, ammonium metatungstate as raw materials can also produce reduced gases. What's more, it is found that NCC is important to produce OVs in  $H_xWO_{3-y}$ /NCC, as only  $WO_3$  with yellow color is produced when the same procedure was conducted without the intrusion of NCC (Figure S22). This phenomenon may be because NCC with functional groups can produce various reduced gases during pyrolysis at high temperature, and the in-situ synthesis process may promise carbon substrate as reducing agent to reduce  $W^{6+}$  to  $W^{5+}$ , and generate OVs simultaneously. Therefore, the OVs generation mechanism can be concluded as the following formula:

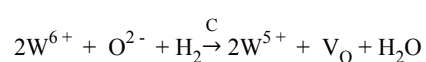

Where  $O^{2-}$  is lattice oxygen and  $V_O$  is oxygen vacancy.

In the synthesis process, when hydrogen intercalation in the octahedra structure of  $WO_3$ , it will produce  $H_xWO_{3-y}$ .

### Charge Storage Mechanism

The adsorption/desorption (at surface) or intercalation/de-intercalation (at subsurface) of cations involved in the charge storage process of  $WO_3$  can be described as the following formula:

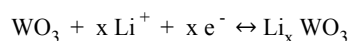

Based on the ex situ XPS results (Figure 3), the charging and discharging of  $WO_3$  only involves the transition between  $W^{6+}$  and  $W^{5+}$ . However, the introduction of OVs in  $H_xWO_{3-y}$  could draw the electrons to the reaction sites. In the reaction sites, more oxygen vacancies and more reduced W ions will improve the redox reaction activities of  $H_xWO_{3-y}$ . Thus, during the charging and discharging, more reduced  $W^{5+}$  and  $W^{4+}$  was produced, improving their charge storage properties.

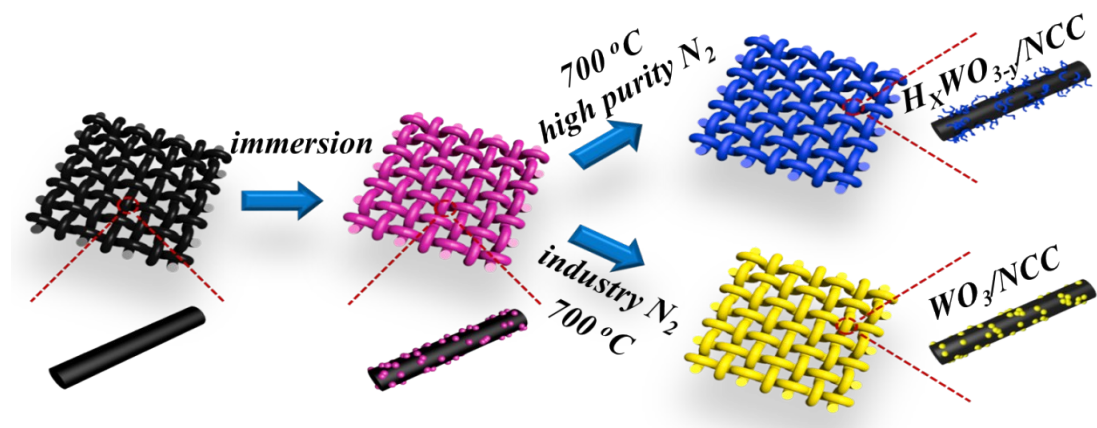

Fig. S1 Schematic representation of the fabrication process for H<sub>x</sub>WO<sub>3-y</sub>/NCC and WO<sub>3</sub>/NCC.

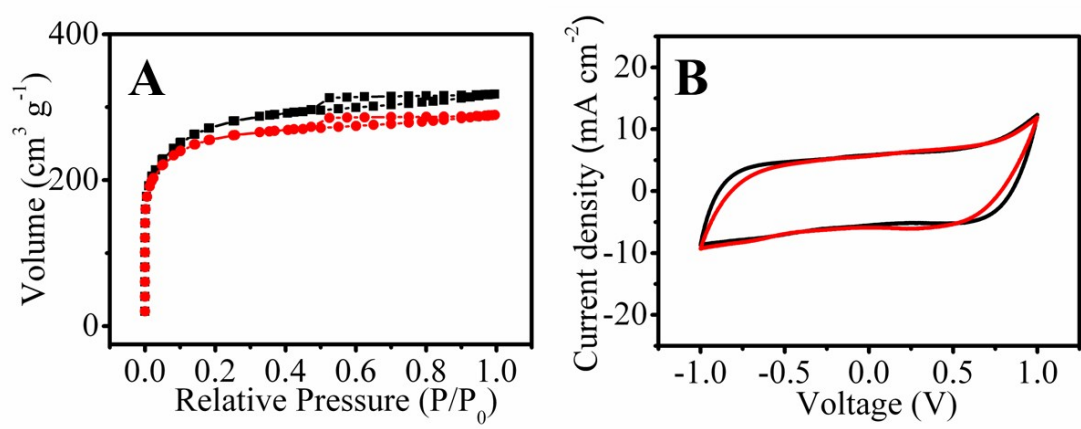

Fig. S2 (A) N<sub>2</sub> adsorption-desorption curves and (B) CV curves at 5 mV/s for NCC annealed according to the procedures for H<sub>x</sub>WO<sub>3-y</sub>/NCC (red curves) and WO<sub>3</sub>/NCC (blue curves).

Table S1 Porosity measurements NCC annealed according to the procedures for  $H_xWO_{3-y}$ /NCC (red curves) and  $WO_3$ /NCC (blue curves) in Figure S2 using nitrogen adsorption/desorption tests.

| Materials                 | $S_{BET}^{[a]}$<br>( $m^2 g^{-1}$ ) | Pore volume ( $cm^3 g^{-1}$ ) |                   |                       | Average pore width (nm) |
|---------------------------|-------------------------------------|-------------------------------|-------------------|-----------------------|-------------------------|
|                           |                                     | $V_{Total}^{[b]}$             | $V_{Micro}^{[c]}$ | $V_{Micro}/V_{Total}$ |                         |
| NCC in $H_xWO_{3-y}$ /NCC | 825                                 | 0.45                          | 0.39              | 0.87                  | 2.16                    |
| NCC in $WO_3$ /NCC        | 895                                 | 0.49                          | 0.41              | 0.84                  | 2.19                    |

[a] Brunauer–Emmett–Teller surface area; [b] Calculated by single-point adsorption; [c] Calculated by t-plot method.

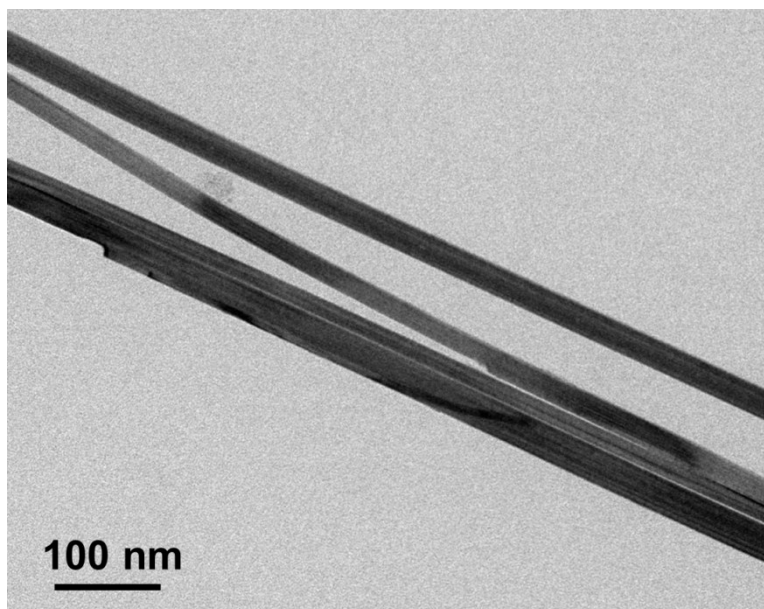

Fig. S3 TEM image of  $H_xWO_{3-y}$  nanowires.

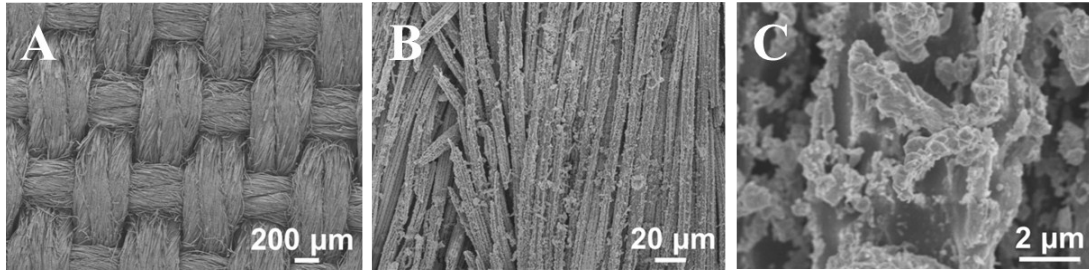

Fig. S4 SEM images of  $\text{WO}_3/\text{NCC}$ .

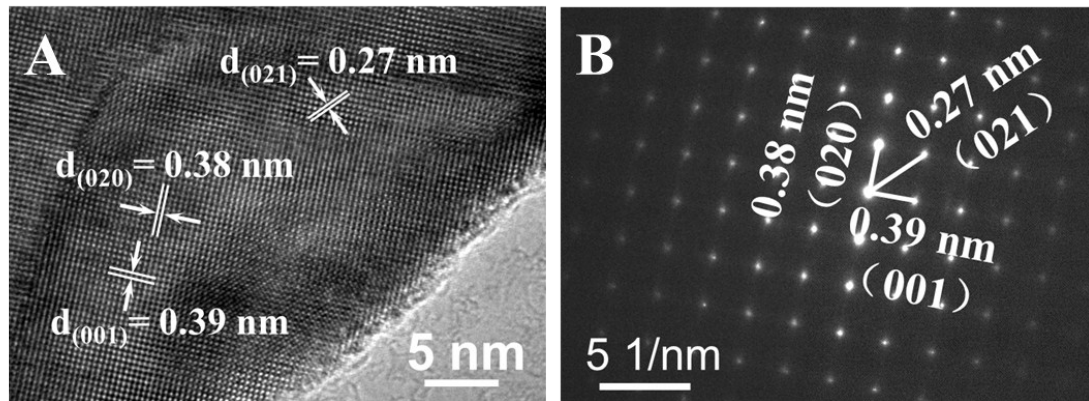

Fig. S5 (A) HRTEM image of  $\text{WO}_3$ . (B) SAED pattern of  $\text{WO}_3$ .

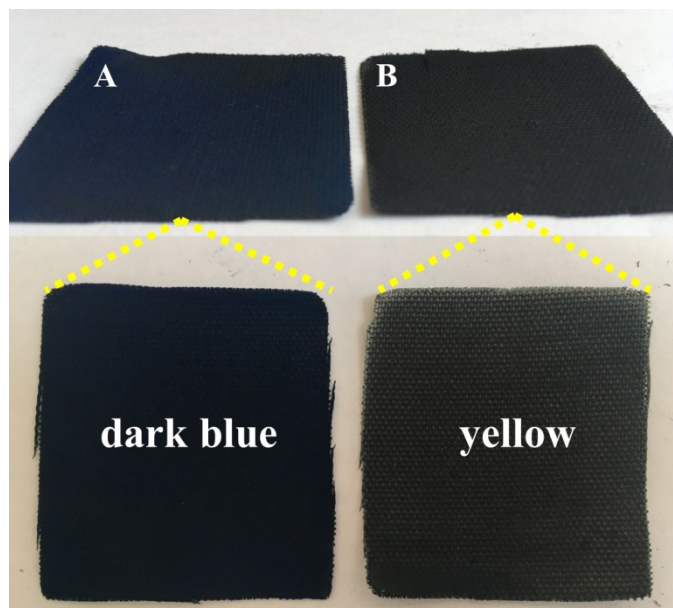

Fig. S6 The digital graph for (A)  $H_xWO_{3-y}/NCC$  and (B)  $WO_3/NCC$ , showing the color for (A)  $H_xWO_{3-y}$  is dark blue and (B) for  $WO_3$  is yellow.

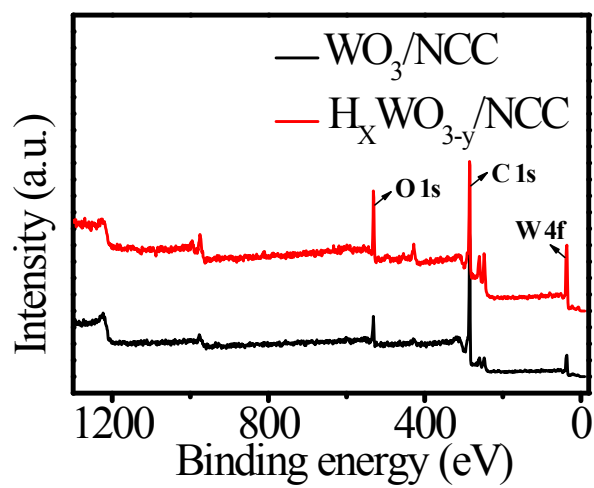

Fig. S7 XPS spectra of  $H_xWO_{3-y}/NCC$  and  $WO_3/NCC$ .

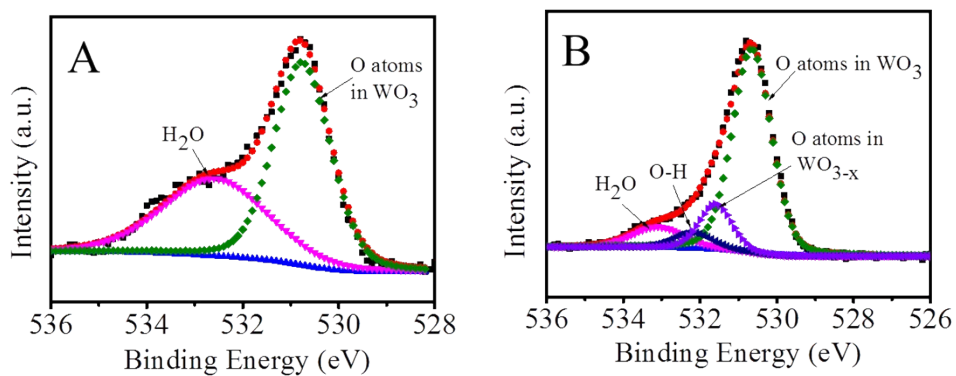

Fig. S8 O1s XPS spectrum for (A)  $\text{WO}_3/\text{NCC}$  and (B)  $\text{H}_x\text{WO}_{3-y}/\text{NCC}$ .

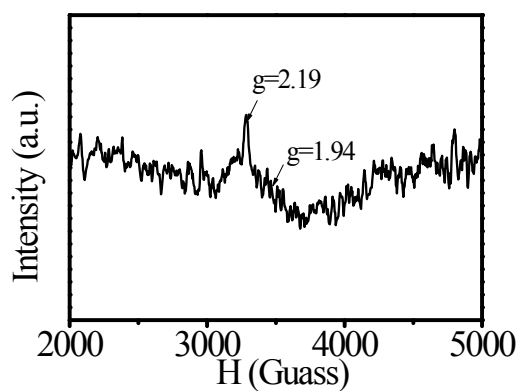

Fig. S9 Electron paramagnetic resonance (EPR) spectrum for  $\text{H}_x\text{WO}_{3-y}$ , where  $H$  is the magnetic field. The spectrum is collected by subtracting the background of NCC from  $\text{H}_x\text{WO}_{3-y}/\text{NCC}$ .



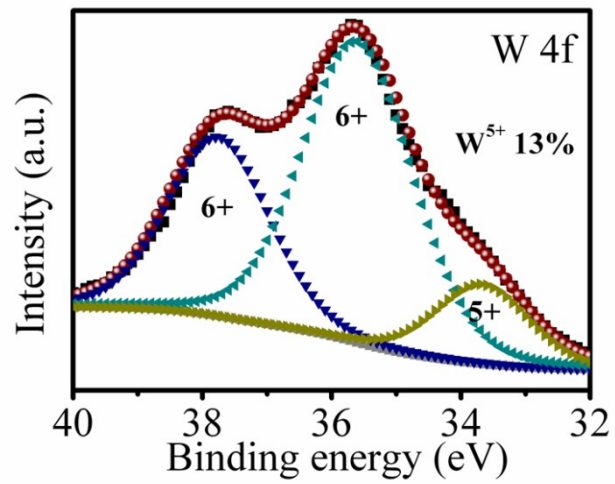

Fig. S10 W 4f XPS spectrum for e- $H_xWO_{3-y}/NCC$ .

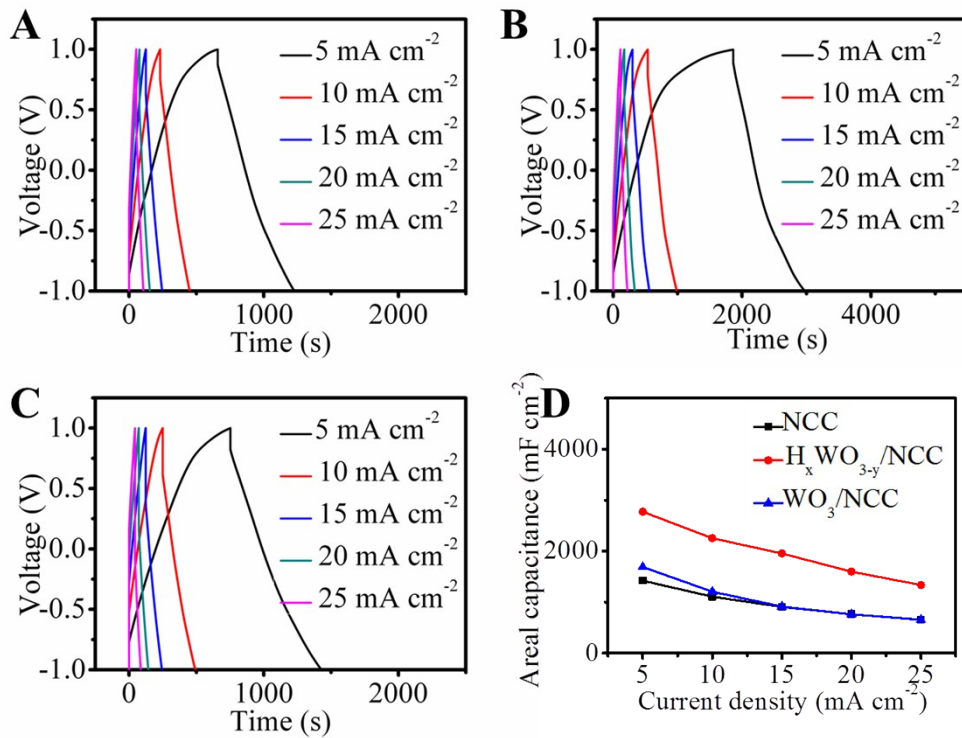

Fig. S11 GCD curves of (A) NCC, (B)  $H_xWO_{3-y}/NCC$  and (C)  $WO_3/NCC$  at various current densities. (D) The areal capacitances for NCC,  $H_xWO_{3-y}/NCC$  and  $WO_3/NCC$  based on the GCD curves.

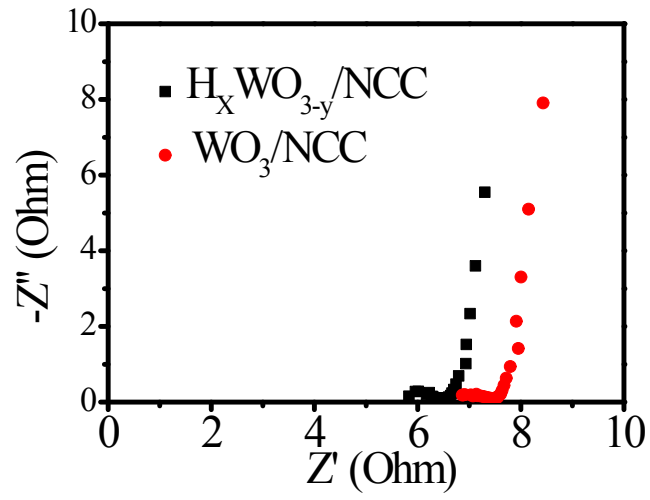

Fig. S12 Nyquist plots for  $H_xWO_{3-y}/NCC$  and  $WO_3/NCC$ .

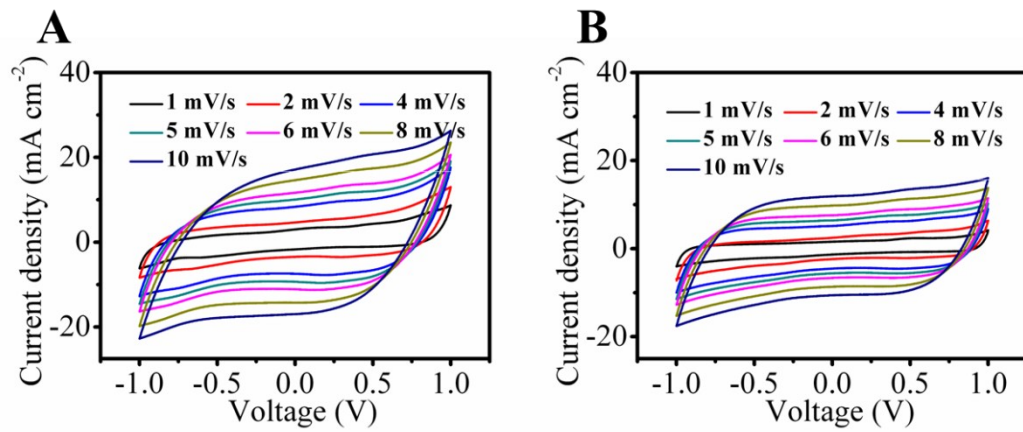

Fig. S13 CV curves of (A)  $H_xWO_{3-y}/NCC$  and (B)  $WO_3/NCC$  at various sweep rates.

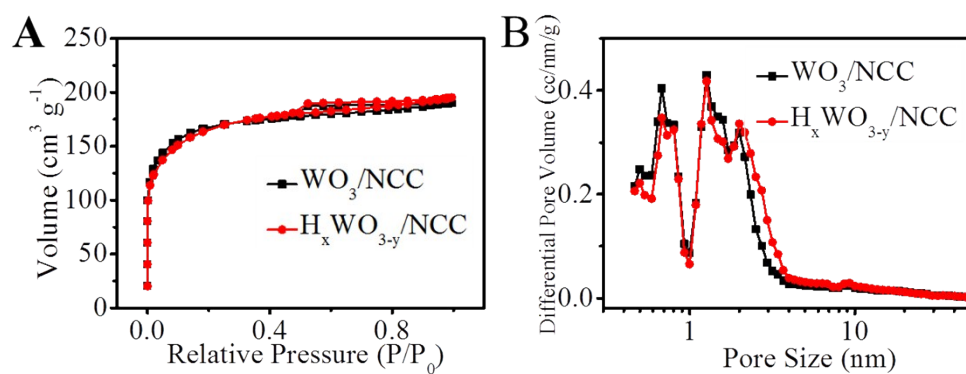

Fig. S14 (A)  $\text{N}_2$  adsorption-desorption curves and (B) pore distributions for  $\text{H}_x\text{WO}_{3-y}/\text{NCC}$  and  $\text{WO}_3/\text{NCC}$ .

Table S2 Porosity measurements of  $\text{WO}_3/\text{NCC}$  and  $\text{H}_x\text{WO}_{3-y}/\text{NCC}$  using nitrogen adsorption/desorption tests.

| Materials                              | $S_{\text{BET}}^{[\text{a}]}$<br>( $\text{m}^2 \text{g}^{-1}$ ) | Pore volume ( $\text{cm}^3 \text{g}^{-1}$ ) |                                 |                                     | Average pore width (nm) |
|----------------------------------------|-----------------------------------------------------------------|---------------------------------------------|---------------------------------|-------------------------------------|-------------------------|
|                                        |                                                                 | $V_{\text{Total}}^{[\text{b}]}$             | $V_{\text{Micro}}^{[\text{c}]}$ | $V_{\text{Micro}}/V_{\text{Total}}$ |                         |
| $\text{WO}_3/\text{NCC}$               | 539                                                             | 0.293                                       | 0.254                           | 0.87                                | 2.18                    |
| $\text{H}_x\text{WO}_{3-y}/\text{NCC}$ | 544                                                             | 0.301                                       | 0.253                           | 0.85                                | 2.21                    |

[a] Brunauer–Emmett–Teller surface area; [b] Calculated by single-point adsorption; [c] Calculated by t-plot method.

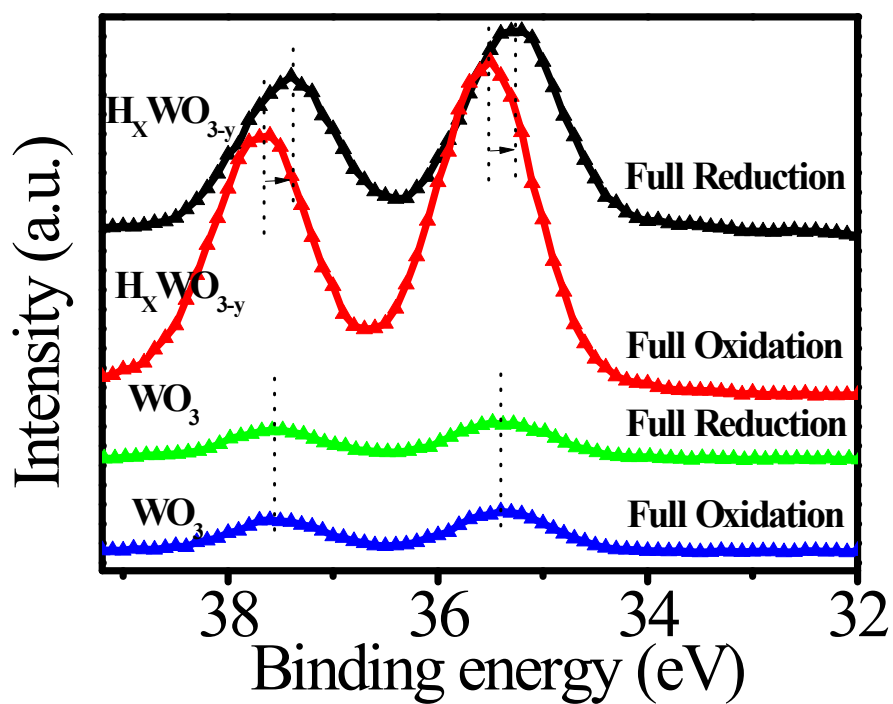

Fig. S15 ex situ XPS spectrum for  $H_xWO_{3-y}$  and  $WO_3$  after full reduction and full oxidation.

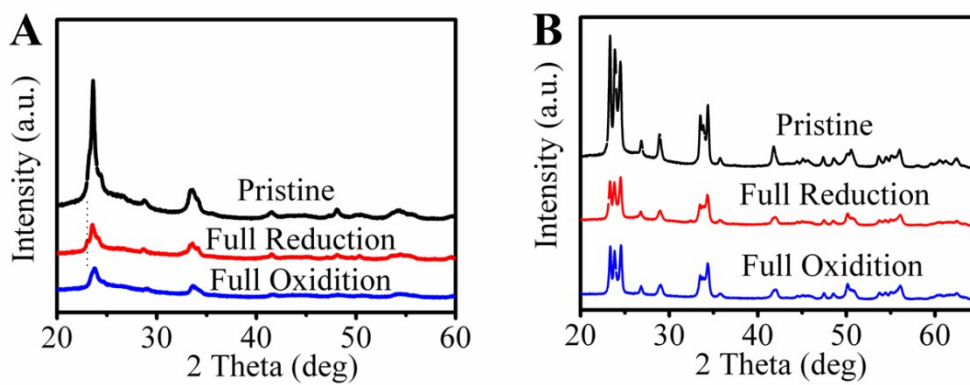

Fig. S16 (A) ex situ XRD patterns for  $H_xWO_{3-y}$  and that after full reduction, as well as full oxidation. (B) ex situ XRD patterns for  $WO_3$  and after that full reduction, as well as full oxidation.

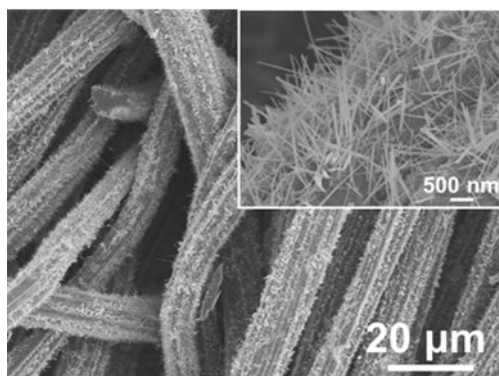

Fig. S17 SEM image of e-H<sub>x</sub>WO<sub>3-y</sub>/NCC.

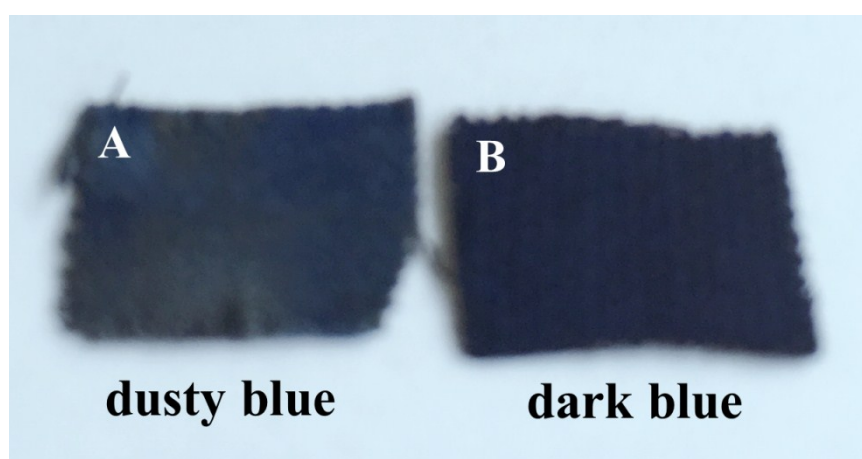

Fig. S18 The digital graph for (A) e-H<sub>x</sub>WO<sub>3-y</sub>/NCC and (B) H<sub>x</sub>WO<sub>3-y</sub>/NCC, showing the color changes from dark blue to dusty blue after argon plasma.

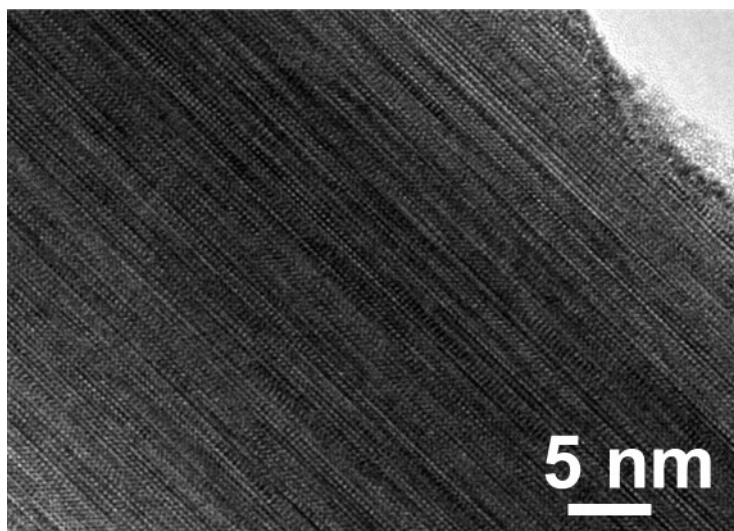

Fig. S19 HRTEM image of  $e\text{-H}_x\text{WO}_{3-y}/\text{NCC}$ , suggesting the surface layer of  $\text{H}_x\text{WO}_{3-y}/\text{NCC}$  can be etched by argon plasma.

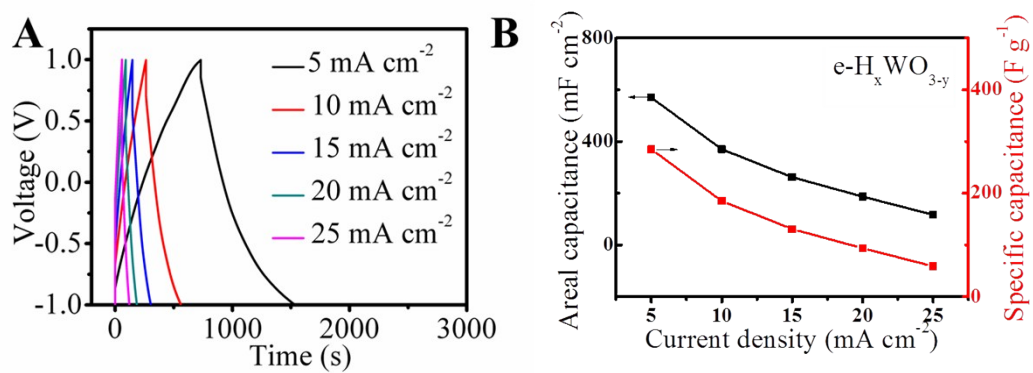

Fig. S20 (A) GCD curves at various current densities for  $e\text{-H}_x\text{WO}_{3-y}$ . (B) The areal capacitances and specific capacitances for  $e\text{-H}_x\text{WO}_{3-y}$ .

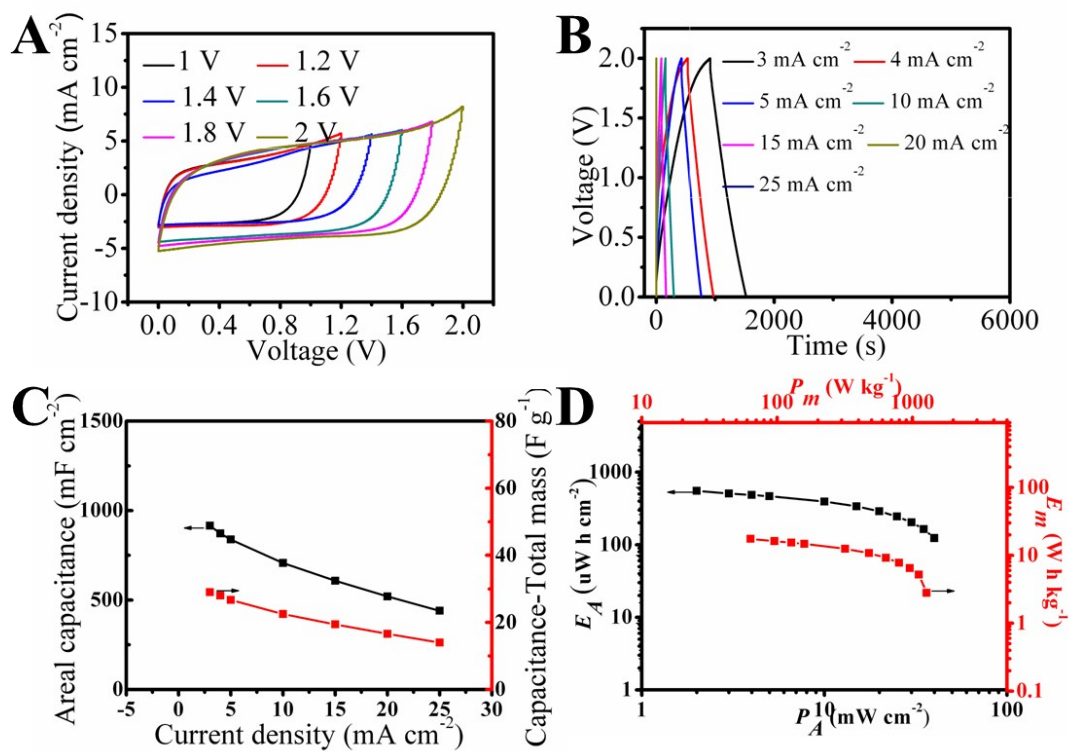

Fig. S21 (A) CV curves for  $H_xWO_{3-y}/NCC//H_xWO_{3-y}/NCC$  device, suggesting the voltage window can be extended to 2 V. (b) GCD curves for  $H_xWO_{3-y}/NCC//H_xWO_{3-y}/NCC$  device at the current densities range from 3 to 25  $mA\ cm^{-2}$ . (C) The areal capacitances and gravimetric capacitances for  $H_xWO_{3-y}/NCC//H_xWO_{3-y}/NCC$  based on the total mass of the device. (D) Ragone plot of  $H_xWO_{3-y}/NCC//H_xWO_{3-y}/NCC$  device.

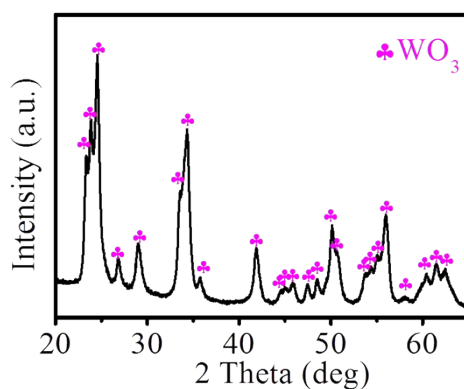

Fig. S22 XRD pattern of the contrast sample synthesized according to the same procedure to  $H_xWO_{3-y}/NCC$  but without the intrusion of NCC.

## References

- 1 H. Wang, J. Deng, C. Xu, Y. Chen, F. Xu, J. Wang and Y. Wang, *Energy Storage Mater.*, 2017, **7**, 216.
